# Supplementary material for: Longitudinal Changes of Ocular Surface Microbiome in Patients Undergoing Hemopoietic Stem Cell Transplant (HSCT)
Source: MDPI journal article supplement (doi:10.3390/jcm13010208), 2023-12-29
Supplement: s1 [file s1]

**Supplementary Table S1:** Differences pre VS post of alpha diversity indexes.

Mean, Median (min; max) [95% CI], p.value (Welch two sample t-test).

oGVHD= ocular Graft Versus Host Disease

| Indexes                 | oGVHD                                                 | Not oGVHD                                               | p. value |
|-------------------------|-------------------------------------------------------|---------------------------------------------------------|----------|
| Shannon index           | -0.44<br>-0.42 (-3.07; 1.33)<br>[-3.07; 1.33]         | 0.39<br>0.28 (-4.72; 4.02)<br>[-1.23; 2.91]             | 0.3317   |
| Chao1 index             | -185.7<br>-179.8 (-836.5; 225.5)<br>[-836.50; 225.53] | 80.78<br>27.13 (-1020.88; 1215.82)<br>[-282.68; 619.08] | 0.2394   |
| No. of observed species | -118.83<br>-93.00 (-642.00; 179.00)<br>[-642; 179]    | 60.12<br>-23.5 (-728.00; 848.00)<br>[-171; 540]         | 0.2774   |
| PD whole tree           | -2.07<br>-0.89 (-8.81; 1.80)<br>[-8.81; 1.80]         | 0.51<br>0.09 (-7.10; 14.49)<br>[-4.51; 3.47]            | 0.2517   |
